# Supplementary material for: Baseline Gene Expression Levels in Falkland-Malvinas Island Penguins: Towards a New Monitoring Paradigm
Source: MDPI journal article supplement (doi:10.3390/life12020258), 2022-02-09
Supplement: s1 [file s1]

# Supplementary Material of Baseline Gene Expression Levels in Falkland-Malvinas Island Penguins: Towards a New Monitoring Paradigm

Table S1. Normalized values of target genes for all samples included in this study.

| Sample ID | Location | Species    | Sex | AHR   | GATA3 | GHR   | HSP70 | IFIT5 | IL_18 | IL_6 | MHC   | Nr3c1 | PRDX4 | PRDX6 | THRa  | TNFRSF6 | VEGFA |
|-----------|----------|------------|-----|-------|-------|-------|-------|-------|-------|------|-------|-------|-------|-------|-------|---------|-------|
| 1         | Captive  | Gentoo     | M   | 5.98  | -1.37 | 0.43  | 2.11  | 1.74  | 4.84  | 6.16 | 0.78  | -1.65 | -1.49 | -2.71 | 0.87  | -0.77   | 5.33  |
| 2         | Captive  | Gentoo     | M   | 6.30  | -1.39 | 0.87  | 1.62  | 2.57  | 6.13  | 6.91 | 0.43  | -1.27 | -1.29 | -2.62 | 1.15  | -0.33   | 5.29  |
| 3         | Captive  | Gentoo     | F   | 5.75  | -0.90 | 3.02  | 1.37  | 2.69  | 6.73  | 6.06 | 0.94  | -1.17 | -0.78 | -2.44 | 1.27  | -0.51   | 4.99  |
| 4         | Captive  | Gentoo     | M   | 5.75  | -1.52 | 2.23  | 1.75  | 1.93  | 5.44  | 5.24 | 1.36  | -1.97 | -0.79 | -2.51 | 0.74  | -1.03   | 4.41  |
| 5         | Captive  | Gentoo     | M   | 6.18  | -1.37 | 2.25  | 2.16  | 2.74  | 7.14  | 5.79 | 1.17  | -1.62 | 0.06  | -3.01 | 1.15  | 0.08    | 5.07  |
| 6         | Captive  | Gentoo     | M   | 4.83  | -1.92 | 0.57  | 1.91  | 0.84  | 5.23  | 5.00 | -1.20 | -2.80 | -1.29 | -4.34 | -0.21 | -1.26   | 3.82  |
| 7         | Captive  | Gentoo     | M   | 5.27  | -1.81 | 1.37  | 2.96  | 1.92  | 6.02  | 5.63 | 1.31  | -1.99 | -0.71 | -2.63 | 1.28  | -0.55   | 4.93  |
| 8         | Captive  | Gentoo     | M   | 6.82  | -1.53 | 2.91  | 3.04  | 2.95  | 6.88  | 6.58 | 2.53  | -0.83 | -1.16 | -1.93 | 2.10  | 0.21    | 6.19  |
| 9         | Captive  | Gentoo     | M   | 6.38  | -1.82 | 3.36  | 3.92  | 1.15  | 6.45  | 6.12 | 2.94  | -1.64 | -1.22 | -1.58 | 0.99  | -0.67   | 5.19  |
| 10        | Captive  | Gentoo     | M   | 12.21 | -2.35 | 1.23  | 1.60  | 2.09  | 5.69  | 4.77 | -0.59 | -2.61 | -1.97 | -4.32 | -0.44 | -1.36   | 3.63  |
| 11        | Captive  | Gentoo     | M   | 6.30  | -1.80 | 1.65  | 2.37  | 0.81  | 6.89  | 6.21 | 1.42  | -2.11 | -1.43 | -3.47 | 0.34  | -1.13   | 4.11  |
| 12        | Captive  | Gentoo     | M   | 5.21  | -1.29 | 1.05  | 2.28  | 1.35  | 6.10  | 5.89 | 2.49  | -1.86 | -0.62 | -2.09 | 0.30  | -0.57   | 4.76  |
| 13        | Captive  | Gentoo     | F   | 6.58  | -1.78 | 5.11  | 2.95  | 1.79  | 7.56  | 6.78 | 2.81  | -0.75 | -0.85 | -1.66 | 2.23  | -0.18   | 5.88  |
| 14        | Captive  | Gentoo     | F   | 4.44  | -2.94 | 2.14  | 2.81  | -0.81 | 5.27  | 5.50 | -0.84 | -2.73 | -2.26 | -2.88 | -0.13 | -0.63   | 4.42  |
| 15        | Captive  | Gentoo     | F   | 5.31  | -1.29 | 1.67  | 6.22  | 1.76  | 6.71  | 6.21 | 1.14  | -1.24 | 0.46  | -2.14 | 1.59  | -0.48   | 5.86  |
| 16        | Captive  | Gentoo     | F   | 6.45  | -1.62 | 4.16  | 2.15  | 2.24  | 7.76  | 6.33 | 2.07  | -0.68 | -0.85 | -1.56 | 2.01  | 0.09    | 5.51  |
| 17        | Captive  | Gentoo     | F   | 5.60  | -1.53 | 4.99  | 2.75  | 2.41  | 7.41  | 5.46 | 0.68  | -1.84 | -0.56 | -2.75 | 0.93  | -0.54   | 5.18  |
| 18        | Captive  | Gentoo     | F   | 4.62  | -2.33 | 5.03  | 1.43  | 1.31  | 5.77  | 5.55 | -1.33 | -2.10 | -1.46 | -3.77 | 1.09  | -0.38   | 4.53  |
| 19        | Captive  | Gentoo     | F   | 5.78  | -1.44 | 3.78  | 2.44  | 2.51  | 7.23  | 5.74 | 1.87  | -1.77 | -0.84 | -2.75 | 1.23  | 0.04    | 4.67  |
| 20        | Captive  | Gentoo     | F   | 5.39  | -2.00 | 3.80  | 2.37  | 2.11  | 6.66  | 5.42 | -0.13 | -2.34 | -1.17 | -3.69 | 0.29  | -1.24   | 5.27  |
| 21        | Captive  | Gentoo     | F   | 4.65  | -2.13 | 4.08  | 1.88  | 2.68  | 6.46  | 5.01 | 0.17  | -2.32 | 0.24  | -3.17 | 0.76  | -1.21   | 4.66  |
| 22        | Captive  | Gentoo     | F   | 4.63  | -1.98 | 2.78  | 1.79  | 2.19  | 6.65  | 5.13 | -0.49 | -2.94 | -1.29 | -3.70 | -0.28 | -1.17   | 3.90  |
| 23        | Captive  | Gentoo     | F   | 5.35  | -1.73 | 3.67  | 1.43  | 1.75  | 9.07  | 5.48 | 1.04  | -1.86 | 0.29  | -3.20 | 0.80  | -0.78   | 5.16  |
| 24        | Captive  | Rockhopper | M   | 8.37  | -0.31 | 8.76  | 3.63  | 0.19  | 12.82 | 6.82 | 4.42  | -0.69 | 0.83  | -2.72 | 1.62  | -0.37   | 8.13  |
| 25        | Captive  | Rockhopper | M   | 7.56  | -0.56 | 9.88  | 3.99  | -1.19 | 8.61  | 5.72 | 3.18  | -0.11 | 0.79  | -1.44 | 1.88  | -0.95   | 7.31  |
| 26        | Captive  | Rockhopper | F   | 7.62  | -0.87 | 12.35 | 5.26  | -0.57 | 10.61 | 4.82 | 1.98  | -1.84 | 0.74  | -2.96 | 0.41  | -1.05   | 5.21  |
| 27        | Captive  | Rockhopper | F   | 6.64  | -1.90 | 13.42 | 4.71  | -2.07 | 9.02  | 6.04 | 1.33  | -1.94 | -1.09 | -1.72 | 0.61  | -1.15   | 5.97  |
| 28        | Captive  | Rockhopper | F   | 7.02  | -1.13 | 12.49 | 8.19  | -1.40 | 8.75  | 5.69 | 2.90  | -1.59 | -0.09 | -0.97 | 1.60  | -1.84   | 7.20  |
| 29        | Captive  | Rockhopper | M   | 12.13 | -0.75 | 6.70  | 7.27  | -0.93 | 9.08  | 6.92 | 4.91  | 0.03  | 1.02  | -0.92 | 2.44  | -0.55   | 7.76  |
| 30        | Captive  | Rockhopper | M   | 12.95 | -1.13 | 7.72  | 5.29  | 0.73  | 9.40  | 6.02 | 2.50  | -0.33 | 1.32  | -2.03 | 2.19  | -0.31   | 6.41  |
| 31        | Captive  | Rockhopper | M   | 6.53  | -1.14 | 7.42  | 3.37  | -0.05 | 10.44 | 5.38 | 2.28  | -1.21 | 1.74  | -2.53 | 1.55  | -1.10   | 6.33  |
| 32        | Captive  | Rockhopper | M   | 5.91  | -1.43 | 12.83 | 4.18  | -0.47 | 9.25  | 5.32 | 1.93  | -1.42 | 0.80  | -2.60 | 0.77  | -1.21   | 4.80  |
| 33        | Captive  | Rockhopper | M   | 8.28  | 0.09  | 9.44  | 4.38  | -0.96 | 9.43  | 7.61 | 3.30  | -0.87 | -0.40 | -1.99 | 1.96  | -0.93   | 7.44  |
| 34        | Captive  | Rockhopper | F   | 6.03  | -1.34 | 2.25  | 2.16  | -1.26 | 10.88 | 5.79 | 2.71  | -1.14 | 0.99  | -3.39 | 1.21  | 0.08    | 5.55  |
| 35        | Captive  | Rockhopper | F   | 8.05  | -1.11 | 9.96  | 4.02  | -0.65 | 8.80  | 6.85 | 5.46  | -0.10 | -0.36 | -0.25 | 2.95  | -0.56   | 7.76  |
| 36        | Captive  | Rockhopper | F   | 6.45  | -1.48 | 14.26 | 3.08  | -0.45 | 9.61  | 5.36 | 3.36  | -0.99 | 0.15  | -2.59 | 1.41  | -1.02   | 5.59  |
| 37        | Captive  | Rockhopper | F   | 7.93  | -0.89 | 7.89  | 3.81  | -1.83 | 9.13  | 6.12 | 2.63  | -0.03 | 0.47  | -1.85 | 2.20  | -0.52   | 6.77  |
| 38        | Captive  | Rockhopper | F   | 8.90  | -0.36 | 8.59  | 3.16  | -0.94 | 9.88  | 5.88 | 4.02  | -0.32 | 0.95  | -0.70 | 2.20  | -0.70   | 6.18  |
| 39        | Islands  | Gentoo     | M   | 3.67  | -1.08 | 1.41  | 4.70  | 1.78  | 9.80  | 4.75 | 1.26  | -2.10 | -0.47 | -2.80 | 1.59  | -2.57   | 4.51  |
| 40        | Islands  | Gentoo     | F   | 3.61  | 0.04  | 4.64  | 6.71  | 2.22  | 7.72  | 5.40 | 0.55  | -2.64 | 1.18  | -2.67 | 2.42  | -2.39   | 3.80  |
| 41        | Islands  | Gentoo     | F   | 4.85  | -0.46 | 0.86  | 8.05  | 2.73  | 8.94  | 4.77 | 2.01  | -1.97 | -0.08 | -1.54 | 2.15  | -2.31   | 4.28  |
| 42        | Islands  | Gentoo     | F   | 2.23  | -0.99 | 2.43  | 7.59  | 1.45  | 7.24  | 7.43 | -0.11 | -2.84 | -0.10 | -1.91 | 1.94  | -2.89   | 7.59  |
| 43        | Islands  | Gentoo     | F   | 3.39  | -1.55 | 3.33  | 5.31  | 2.93  | 8.24  | 4.05 | 0.82  | -3.52 | -0.82 | -3.12 | 0.78  | -3.54   | 3.29  |
| 44        | Islands  | Gentoo     | F   | 3.69  | 0.83  | 2.53  | 7.85  | 1.78  | 10.20 | 4.98 | 2.08  | -2.70 | 0.17  | -0.63 | 2.28  | -3.05   | 4.97  |
| 45        | Islands  | Gentoo     | F   | 2.33  | -0.27 | 1.31  | 7.44  | 1.43  | 8.41  | 4.40 | 2.60  | -2.57 | -1.42 | -1.34 | 3.01  | -2.72   | 9.60  |
| 46        | Islands  | Gentoo     | M   | 3.24  | -2.09 | 1.62  | 6.50  | 2.34  | 7.62  | 3.30 | 1.90  | -3.11 | -0.61 | -2.29 | 1.82  | -3.05   | 8.03  |
| 47        | Islands  | Gentoo     | F   | 3.31  | -1.28 | 3.56  | 2.88  | 2.40  | 9.56  | 3.79 | 0.77  | -3.71 | -0.87 | -3.16 | 0.83  | -2.02   | 3.87  |
| 48        | Islands  | Gentoo     | F   | 3.36  | -1.14 | 2.04  | 6.35  | 0.17  | 9.59  | 4.16 | -0.59 | -2.84 | -0.56 | -2.52 | 1.56  | -3.00   | 4.58  |
| 49        | Islands  | Gentoo     | M   | 3.77  | 0.48  | 1.59  | 7.99  | 2.22  | 9.52  | 4.95 | 1.33  | -2.32 | 0.16  | -1.71 | 2.92  | -2.42   | 3.75  |
| 50        | Islands  | Gentoo     | F   | 3.33  | 2.03  | 3.79  | 2.40  | -0.12 | 8.70  | 4.79 | 4.39  | -2.57 | 0.18  | -0.77 | 3.25  | -2.86   | 5.66  |
| 51        | Islands  | Gentoo     | F   | 3.40  | 0.30  | 2.24  | 2.20  | 1.71  | 8.64  | 3.68 | 1.79  | -2.61 | -0.81 | -2.21 | 2.50  | -2.95   | 4.87  |
| 52        | Islands  | Gentoo     | M   | 3.58  | -1.14 | 1.54  | 6.90  | 1.94  | 8.63  | 4.23 | 1.20  | -2.99 | 1.19  | -2.26 | 1.14  | -3.21   | 3.32  |
| 53        | Islands  | Gentoo     | F   | 4.53  | -0.97 | 2.85  | 5.37  | 2.77  | 8.47  | 3.58 | 0.36  | -2.98 | -0.01 | -3.04 | 0.41  | -2.73   | 4.14  |
| 54        | Islands  | Gentoo     | F   | 3.70  | -1.38 | 3.26  | 5.72  | 2.63  | 9.31  | 4.58 | -1.01 | -2.90 | 0.36  | -2.86 | 0.04  | -2.80   | 3.92  |
| 55        | Islands  | Gentoo     | F   | 4.20  | -0.96 | 3.59  | 3.70  | 1.74  | 9.41  | 4.92 | 2.55  | -2.71 | 0.83  | -2.09 | 2.29  | -2.65   | 4.22  |
| 56        | Islands  | Gentoo     | M   | 3.46  | -0.68 | 0.36  | 7.57  | 2.51  | 8.32  | 4.39 | 1.69  | -2.26 | -0.23 | -1.62 | 1.44  | -3.04   | 9.21  |
| 57        | Islands  | Gentoo     | F   | 2.41  | -0.11 | 3.14  | 8.72  | 0.28  | 9.25  | 4.30 | 2.20  | -2.95 | 0.24  | -2.13 | 0.70  | -2.68   | 4.75  |
| 58        | Islands  | Gentoo     | F   | 3.73  | -0.36 | 2.28  | 7.77  | 1.07  | 10.21 | 3.90 | 4.02  | -2.78 | -1.04 | -1.80 | 2.90  | -4.12   | 4.96  |
| 59        | Islands  | Gentoo     | F   | 1.90  | -0.64 | 2.21  | 8.39  | 0.69  | 7.62  | 4.22 | 1.02  | -2.80 | -2.10 | -1.90 | 2.30  | -3.81   | 3.36  |
| 60        | Islands  | Gentoo     | F   | 3.40  | -1.37 | 2.88  | 4.62  | 2.11  | 6.45  | 3.68 | 0.00  | -3.37 | -1.01 | -3.15 | 0.35  | -3.32   | 4.86  |
| 61        | Islands  | Gentoo     | F   | 2.94  | 0.02  | 2.34  | 7.73  | 1.28  | 9.81  | 3.62 | 1.34  | -2.59 | -1.13 | -2.31 | 2.59  | -3.14   | 4.80  |
| 62        | Islands  | Gentoo     | F   | 3.30  | 1.04  | 1.33  | 8.16  | 1.68  | 6.48  | 3.69 | 1.70  | -2.32 | -0.29 | -1.18 | 2.29  | -3.57   | 5.41  |
| 63        | Islands  | Gentoo     | F   | 3.61  | -1.02 | 2.10  | 5.30  | 1.94  | 7.26  | 4.75 | 2.37  | -2.75 | -0.75 | -1.20 | 1.53  | -2.29   | 4.05  |
| 64        | Islands  | Gentoo     | M   | 1.57  | 0.52  | -0.55 | 4.92  | 1.33  | 7.57  | 3.87 | 2.93  | -2.46 | -1.55 | -1.67 | 3.04  | -3.46   | 4.46  |
| 65        | Islands  | Gentoo     | F   | 2.64  | 0.65  | 3.01  | 7.81  | 1.50  | 7.99  | 3.97 | 1.80  | -2.71 | -0.48 | -1.21 | 1.86  | -2.86   | 5.32  |
| 66        | Islands  | Gentoo     | F   | 2.67  | 1.35  | 3.11  | 6.30  | 0.84  | 7.94  | 4.84 | 2.46  | -1.88 | -0.72 | -0.88 | 2.63  | -1.77   | 4.36  |
| 67        | Islands  | Gentoo     | M   | 2.55  | -2.18 | -0.06 | 6.22  | 1.15  | 6.60  | 4.13 | 1.22  | -3.56 | -2.17 | -2.65 | 1.85  | -3.21   | 3.29  |
| 68        | Islands  | Gentoo     | M   | 3.45  | 1.48  | 1.45  | 8.57  | 2.10  | 9.18  | 4.58 | 3.49  | -1.48 | -0.23 | -0.43 | 4.04  | -2.58   | 6.10  |
| 69        | Islands  | Gentoo     | M   | 3.05  | -0.52 | -0.49 | 7.38  | 1.10  | 8.25  | 6.26 | 2.06  | -2.17 | -0.79 | -1.71 | 2.38  | -3.63   | 4.41  |
| 70        | Islands  | Gentoo     | F   | 1.95  | -0.01 | 4.70  | 3.42  | 1.59  | 7.97  | 3.63 | 1.53  | -2.85 | -0.91 | -2.31 | 2.35  | -2.39   | 5.02  |
| 71        | Islands  | Gentoo     | M   | 3.48  | 0.51  | 1.31  | 7.94  | 1.46  | 9.34  | 6.15 | 0.15  | -1.87 | -0.24 | -1.13 | 2.91  | -2.63   | 6.04  |
| 72        | Islands  | Gentoo     | F   | 2.40  | -0.42 | 3.17  | 4.40  | 1.03  | 7.81  | 4.75 | -0.41 | -2.92 | -0.28 | -2.83 | 0.38  | -2.59   | 3.79  |
| 73        | Islands  | Gentoo     | M   | 2.82  | 0.31  | 1.38  | 9.16  | 0.79  | 7.15  | 4.32 | 3.19  | -2.71 | -1.65 | -1.46 | 3.20  | -3.26   | 10.57 |
| 74        | Islands  | Gentoo     | F   | 8.41  | -0.83 | 2.12  | 8.41  | 1.08  | 8.52  | 3.34 | 0.44  | -3.66 | -0.48 | -2.76 | 1.93  | -2.54   | 4.50  |
| 75        | Islands  | Gentoo     | F   | 1.17  | -0.79 | 2.25  | 3.44  | -1.10 | 5.76  | 3.63 | 1.48  | -3.25 | -2.48 | -2.08 | 3.05  | -3.65   | 4.55  |
| 76        | Islands  | Gentoo     | M   | 2.24  | -1.31 | 2.28  | 1.95  | 0.85  | 7.35  | 3.69 | 2.20  | -2.88 | -0.92 | -1.91 | 2.33  | -2.81   | 3.23  |
| 77        | Islands  | Gentoo     | F   | 2.52  | -1.14 | 1.46  | 0.87  | 1.00  |       |      |       |       |       |       |       |         |       |

---

|             |            |   |      |       |       |       |       |       |      |      |       |       |       |      |       |      |
|-------------|------------|---|------|-------|-------|-------|-------|-------|------|------|-------|-------|-------|------|-------|------|
| 98 Islands  | Rockhopper | F | 3.56 | -0.52 | 4.89  | 4.62  | -2.79 | 10.28 | 4.83 | 2.08 | -1.00 | -1.24 | -1.73 | 2.10 | -2.67 | 4.79 |
| 99 Islands  | Rockhopper | M | 4.21 | 1.07  | 8.67  | 9.24  | -2.51 | 9.24  | 4.41 | 9.24 | -2.53 | 0.37  | -0.85 | 2.33 | -2.91 | 6.17 |
| 100 Islands | Rockhopper | F | 3.45 | -0.09 | 4.66  | 5.12  | -2.02 | 10.25 | 3.82 | 1.40 | -2.69 | -0.70 | -1.45 | 1.90 | -3.04 | 4.58 |
| 101 Islands | Rockhopper | F | 2.50 | 0.05  | 8.58  | 10.15 | -2.80 | 9.24  | 4.35 | 2.01 | -2.75 | -0.32 | -1.29 | 2.19 | -3.22 | 5.47 |
| 102 Islands | Rockhopper | F | 3.36 | 0.87  | 10.58 | 7.59  | -1.35 | 8.83  | 4.57 | 2.41 | -1.67 | 0.41  | -0.94 | 3.28 | -2.44 | 5.34 |
| 103 Islands | Rockhopper | M | 2.92 | -0.27 | 9.08  | 9.24  | -2.19 | 9.24  | 3.77 | 5.02 | -3.21 | -0.81 | -2.29 | 1.92 | -2.71 | 9.24 |
| 104 Islands | Rockhopper | F | 4.27 | -0.96 | 9.41  | 9.41  | -2.57 | 9.82  | 3.47 | 2.38 | -2.96 | -0.64 | -1.48 | 1.26 | -3.33 | 3.78 |
| 105 Islands | Rockhopper | F | 2.45 | -0.57 | 4.73  | 8.31  | -3.41 | 7.98  | 4.55 | 2.14 | -3.28 | -0.86 | -1.94 | 2.22 | -3.00 | 4.13 |
| 106 Islands | Rockhopper | F | 3.19 | -0.74 | 4.67  | 7.86  | -1.47 | 9.39  | 4.35 | 3.30 | -2.23 | 0.62  | -1.56 | 1.24 | -3.03 | 5.25 |
| 107 Islands | Rockhopper | M | 2.61 | -0.30 | 5.63  | 10.05 | -3.24 | 8.82  | 4.23 | 1.36 | -2.11 | -0.97 | -1.50 | 1.91 | -3.27 | 4.03 |
| 108 Islands | Rockhopper | M | 2.68 | -0.77 | 7.97  | 7.81  | -4.57 | 8.01  | 3.43 | 2.48 | -3.51 | 0.04  | -2.01 | 1.63 | -3.75 | 7.81 |
| 109 Islands | Rockhopper | M | 8.23 | -0.81 | 4.76  | 8.23  | -2.45 | 8.46  | 8.23 | 2.09 | -3.43 | -1.49 | -1.35 | 2.93 | -3.00 | 4.13 |
| 110 Islands | Rockhopper | F | 2.78 | -1.96 | 8.14  | 8.05  | -2.89 | 9.52  | 4.12 | 4.21 | -3.34 | -0.30 | -1.99 | 1.01 | -3.38 | 9.60 |
| 111 Islands | Rockhopper | M | 3.11 | -0.09 | 7.06  | 8.77  | -2.76 | 7.92  | 3.86 | 2.05 | -2.76 | 0.26  | -0.52 | 2.84 | -3.28 | 4.59 |
